# Supplementary material
Source: PubMed Central journal article supplement (PMC3600401)
Supplement: NIHMS421160-supplement-02.pdf [file NIHMS421160-supplement-02.pdf]

**Supplementary Information**

**RTA 405, A SYNTHETIC TRITERPENOID, INCREASES GLOMERULAR  
FILTRATION RATE AND REDUCES ANGIOTENSIN II-INDUCED CONTRACTION  
OF GLOMERULAR MESANGIAL CELLS**

Running Title: RTA405 modulates GFR by inhibiting MC contraction

**Yanfeng Ding<sup>1</sup>, Rhesa Stidham<sup>2</sup>, Ron Bumeister<sup>2</sup>, Isaac Trevino<sup>2</sup>, Ali Winters<sup>1</sup>, Marc  
Sprouse<sup>1</sup>, Min Ding<sup>1</sup>, Deborah A. Ferguson<sup>2</sup>, Colin J. Meyer<sup>2</sup>, W. Christian Wigley<sup>2</sup> and  
Rong Ma<sup>1\*</sup>**

1: Department of Integrative Physiology and Cardiovascular Research Institute

University of North Texas Health Science Center, Fort Worth, TX

2: Reata Pharmaceuticals Inc., Irving, TX

\*: To whom correspondence should be addressed:

RES-302G, 3500 Camp Bowie Blvd.

Department of Integrative Physiology

University of North Texas Health Science Center

Fort Worth, TX 76107

Tel: 817-735-2516; Fax: 817-735-5084

E-mail: rong.ma@unthsc.edu

## FIGURE LEGENDS

### **Fig. S1. RTA 405 induced expression of Nrf2 target genes in cultured rat mesangial cells with and without Ang II treatment.**

Rat Primary Mesangial Cells were seeded at  $1.3 \times 10^5$  cells per well in 6-well tissue culture dishes in DMEM + 15% Horse Serum + 1% Penicillin/Streptomycin. On following day cells were treated with different concentrations of RTA 405 for 16 hours, or RTA 405 for 16 hours followed by Ang II (1  $\mu$ M) for 30 minutes, or Ang II (1  $\mu$ M) for 30 minutes followed by RTA 405 for 16 hours. RNA was isolated using QIAshredder and RNeasy kits (Qiagen) and was reverse transcribed using iSCRIPT (Bio-Rad). qPCR was performed using SYBR Green (Bio-Rad) and Bio-Rad CFX instruments. Data was analyzed using the DDCT method and normalized to Rpl19. Figures are the average of technical replicates (n=1). Error bars are standard deviation of technical replicates. *Nqo1*: NAD(P)H dehydrogenase quinone 1; *Hmxo1*: heme oxygenase 1; *Gclc*: glutamate-cysteine ligase, catalytic subunit; *Txnrd1*: thioredoxin reductase 1.

### **Fig. 2S. Effect of RTA 405 treatment on the activity of Nrf2-related enzymes in rat kidney.**

Male Sprague-Dawley rats were administered vehicle (sesame oil, n=3) or RTA 405 (100 mg/kg, n=5), once daily for 3 days. On Day 3, rats were euthanized 16 hours after the final dose and kidneys were removed, frozen in liquid nitrogen and stored at -80°C until analysis. NAD(P)H dehydrogenase quinone 1 (Nqo1) enzyme activity was determined by quantifying the rate of disappearance of DCPIP. Glutathione reductase (Gsr), glutathione S-transferase (Gst), and thioredoxin reductase (Txnrd) enzyme activity were determined using commercially available kits. Total GSH was determined using the Promega GSH-Glo™ assay. \* denotes P<0.05 and † denotes P<0.1, compared to corresponding vehicles.

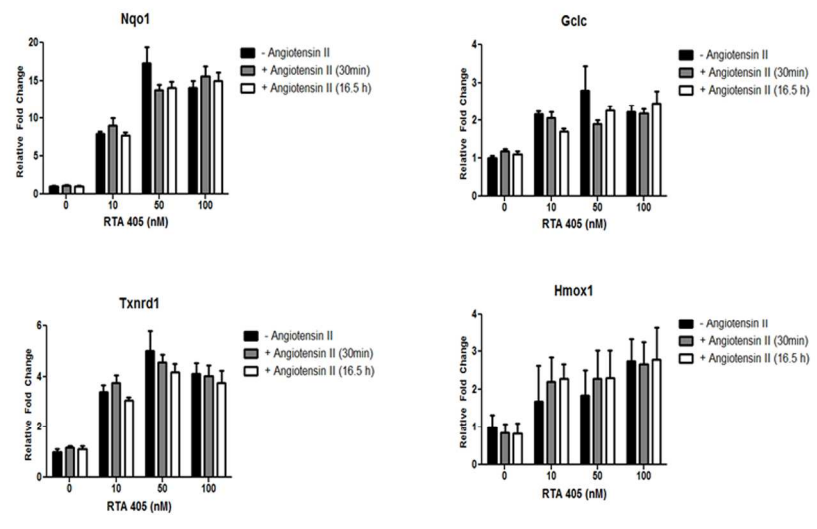

Fig. 1S

254x190mm (450 x 450 DPI)

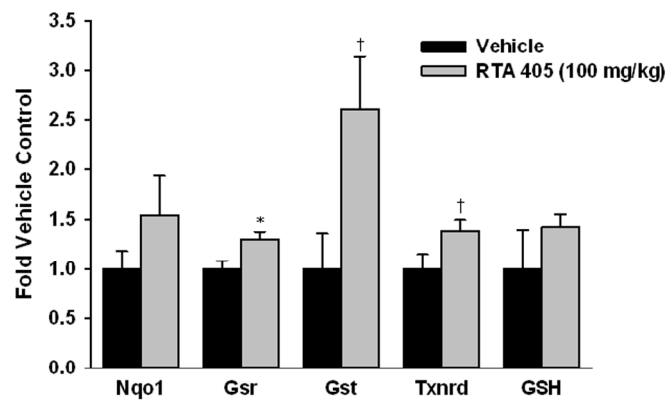

Fig. 2S

254x190mm (450 x 450 DPI)
